# Supplementary material for: Co-occurring microflora and mucin drive Pseudomonas aeruginosa diversification and pathoadaptation
Source: ISME Commun. 2024 Mar 28;4(1):ycae043. doi: 10.1093/ismeco/ycae043 (PMC11067959; doi:10.1093/ismeco/ycae043)
Supplement: Table_S1_ycae043 [file table_s1_ycae043.xlsx]

## Sheet: wilcox test
Table S1. Wilcox tests Holm adjusted for multiple comparisons, testing for significant difference between ancestral trait values and within treatments evolved trait values
Competitor		no competitor			no competitor			SA			SA			SM			SM			SM+SA			SM+SA
Mucin		−mucin			/+mucin			−mucin			/+mucin			−mucin			/+mucin			−mucin			/+mucin
trait	difference	W statistic	p-value	difference	W statistic	p-value	difference	W statistic	p-value	difference	W statistic	p-value	difference	W statistic	p-value	difference	W statistic	p-value	difference	W statistic	p-value	difference	W statistic	p-value
pyoverdine	↑	805	1.53671e-05	↑	847	9.3432e-07	—	409	1	↑	700	0.00502102	—	640	0.0639335	↑	818	6.65456e-06	—	248	0.151958	—	622	0.12337
pyocanin	—	420	1	↑	679	0.0130193	—	233	0.0893496	↓	184	0.0124609	↓	162	0.0045693	—	384	1	—	318	1	—	261	0.234381
adherence	—	492	1	↑	721	0.00180945	↓	42	5.11623e-06	—	339	1	↓	183	0.0119246	—	623	0.119097	↓	37	3.67025e-06	—	348	1
elastase	↓	165	0.00526214	↓	175	0.00834069	↑	785	5.2869e-05	—	268	0.292957	↑	720	0.00190249	—	318	1	↑	766	0.000161326	—	591	0.342064
protease	—	645.5	0.0517167	—	531	1	—	600	0.257848	—	579.5	0.481688	—	413	1	↑	675	0.0154642	↑	671	0.0183489	↑	667	0.0217291
doubling time	—	472	1	↑	779	7.56586e-05	—	608	0.198982	↑	654	0.0370782	↑	650	0.0139451	↑	683	0.0109152	—	594	0.311828	↑	740	0.000677604
max growth	—	231	0.0830006	—	451	1	—	321.5	1	↑	666	0.0226886	—	315.5	1	—	624	0.114871	↑	766	0.000161031	↑	803	1.73798e-05
lag time	↑	729	0.00114558	↑	779	7.03054e-05	↑	700	0.00484245	↑	770	0.000101483	↑	798	2.54683e-06	↑	736	0.000762235	—	403	1	↑	748	0.000406367
