# Supplementary material for: Co-occurring microflora and mucin drive Pseudomonas aeruginosa diversification and pathoadaptation
Source: ISME Commun. 2024 Mar 28;4(1):ycae043. doi: 10.1093/ismeco/ycae043 (PMC11067959; doi:10.1093/ismeco/ycae043)
Supplement: Table_S2_ycae043 [file table_s2_ycae043.xlsx]

## Sheet: Sheet1
Table 2. Linear mixed effect model with competitor and mucin as interating fixed effects and replicate population as a random effect.
		competitor		mucin		competitor × mucin
Trait	F-value (3,559)	p-value	F-value (1,559)	p-value	F-value (3,559)	p-value
Pyoverdine	99.354	<0.0001	123.424	<0.0001	8.703	<0.0001
Pyocyanin	72.601	<0.0001	15.765	0.0001	22.7181	<0.0001
Adherence	74.377	<0.0001	158.627	<0.0001	4.717	0.0029
Elastase	62.4766	<0.0001	75.3419	<0.0001	18.2292	<0.0001
Protease	4.556	0.0036	0.828	0.3632	14.707	<0.0001
Doubling time	0.932	0.4249	19.618	<0.0001	12.632	<0.0001
Max growth	43.4	<0.0001	39.3	<0.0001	11.64	<0.0001
Lag time	24.903	<0.0001	0.514	0.4739	33.458	<0.0001
