# Supplementary material for: Co-occurring microflora and mucin drive Pseudomonas aeruginosa diversification and pathoadaptation
Source: ISME Commun. 2024 Mar 28;4(1):ycae043. doi: 10.1093/ismeco/ycae043 (PMC11067959; doi:10.1093/ismeco/ycae043)
Supplement: Table_S3_ycae043 [file table_s3_ycae043.xlsx]

## Sheet: Sheet1
Table S3. Brown-Forsythe test (ANOVA on absolute deviations of groups data from their individual medians), testing for equality of groups variance with interaction between competitor identity and mucin.
Pyoverdine	Df	Sum Sq	Mean Sq	F value	Pr(>F)
Competitor	4	4.17	1.041	2.926	0.020519	*
Mucin	1	5.38	5.377	15.11	0.000113	***
Competitor:Mucin	3	4.03	1.343	3.774	0.010584	*
Residuals	575	204.61	0.356
Pyocyanin	Df	Sum Sq	Mean Sq	F value	Pr(>F)
Competitor	4	2.98	0.745	2.798	0.025426	*
Mucin	1	3.88	3.878	14.557	0.000151	***
Competitor:Mucin	3	0.66	0.221	0.829	0.478038
Residuals	575	153.17	0.266
Adherence	Df	Sum Sq	Mean Sq	F value	Pr(>F)
Competitor	4	5.1	1.274	4.605	0.00115	**
Mucin	1	7.69	7.685	27.782	1.92e-07	***
Competitor:Mucin	3	1.33	0.442	1.597	0.18894
Residuals	575	159.07	0.277
Elastase	Df	Sum Sq	Mean Sq	F value	Pr(>F)
Competitor	4	2.57	0.642	1.709	0.14649
Mucin	1	12.56	12.557	33.428	1.21e-08	***
Competitor:Mucin	3	5.13	1.71	4.553	0.00365	**
Residuals	575	216	0.376
Protease	Df	Sum Sq	Mean Sq	F value	Pr(>F)
Competitor	4	4.24	1.0594	2.333	0.0546	.
Mucin	1	0.02	0.0245	0.054	0.8164
Competitor:Mucin	3	2.76	0.9212	2.029	0.1088
Residuals	575	261.11	0.4541
Doubling Time	Df	Sum Sq	Mean Sq	F value	Pr(>F)
Competitor	4	5.57	1.3916	3.647	0.00604	**
Mucin	1	0.6	0.5982	1.568	0.21107
Competitor:Mucin	3	2.62	0.8737	2.29	0.07738	.
Residuals	575	219.41	0.3816
Max Growth	Df	Sum Sq	Mean Sq	F value	Pr(>F)
Competitor	4	11.32	2.831	7.943	3.09e-06	***
Mucin	1	13.89	13.89	38.97	8.36e-10	***
Competitor:Mucin	3	4.49	1.496	4.198	0.00594	**
Residuals	575	204.95	0.356
Lag Time	Df	Sum Sq	Mean Sq	F value	Pr(>F)
Competitor	4	2.38	0.596	1.717	0.1446
Mucin	1	6.15	6.148	17.727	2.96e-05	***
Competitor:Mucin	3	2.3	0.765	2.207	0.0862	.
Residuals	575	199.41	0.347
