# Supplementary material for: Co-occurring microflora and mucin drive Pseudomonas aeruginosa diversification and pathoadaptation
Source: ISME Commun. 2024 Mar 28;4(1):ycae043. doi: 10.1093/ismeco/ycae043 (PMC11067959; doi:10.1093/ismeco/ycae043)
Supplement: Table_S4_ycae043 [file table_s4_ycae043.xlsx]

## Sheet: All mutations
Table S4. Mutations identified in whole population sequencing of evovled P. aeruginosa populations
sample id	competitor	mucin	population	position	mutation	freq	effect	annotation	gene	desciption	id
PA1	None	N	1	5638868	G→C	0.111	intergenic	intergenic (+64/‑81)	aceE → / → aceF	pyruvate dehydrogenase/dihydrolipoamide acetyltransferase	PA
PA1	None	N	1	1698528	C→G	0.118	missense_variant	A474P (GCC→CCC)	aer ←	aerotaxis receptor Aer	PA
PA1	None	N	1	1086985	Δ12 bp	0.174	deletion	coding (100‑111/999 nt)	mvfR ←	Transcriptional regulator MvfR	PA
PA1	None	N	1	5155647	G→A	0.66	synonymous_variant	L29L (CTG→CTA)	nfxB →	transcriptional regulator NfxB	PA
PA1	None	N	1	411130	C→G	0.075	intergenic	intergenic (‑196/‑94)	PA0366 ← / → PA0367	probable aldehyde dehydrogenase/probable transcriptional regulator	PA
PA1	None	N	1	1373303	C→G	0.128	synonymous_variant	P181P (CCG→CCC)	PA1264 ←	probable transcriptional regulator	PA
PA1	None	N	1	3217912	T→G	0.093	missense_variant	S170R (AGC→CGC)	PA2865 ←	probable glycosylase	PA
PA1	None	N	1	3858581	A→C	0.099	missense_variant	L210R (CTG→CGG)	PA3453 ←	conserved hypothetical protein	PA
PA1	None	N	1	4408891	T→A	0.074	intergenic	intergenic (+157/‑33)	PA3932 → / → PA3933	probable transcriptional regulator/probable choline transporter	PA
PA1	None	N	1	5431327	T→G	0.074	intergenic	intergenic (+189/+54)	PA4838 → / ← speA	hypothetical protein/biosynthetic arginine decarboxylase	PA
PA1	None	N	1	226476	G→C	0.072	missense_variant	A292P (GCC→CCC)	pntB →	pyridine nucleotide transhydrogenase, beta subunit	PA
PA1	None	N	1	4962241	T→G	0.073	intergenic	intergenic (‑54/+32)	sspA ← / ← PA4429	stringent starvation protein A/probable cytochrome c1 precursor	PA
PA1M	None	Y	1	5638868	G→C	0.088	intergenic	intergenic (+64/‑81)	aceE → / → aceF	pyruvate dehydrogenase/dihydrolipoamide acetyltransferase	PAM
PA1M	None	Y	1	1086985	Δ12 bp	0.244	deletion	coding (100‑111/999 nt)	mvfR ←	Transcriptional regulator MvfR	PAM
PA1M	None	Y	1	1408407	Δ3 bp	0.058	deletion	coding (523‑525/981 nt)	PA1297 ←	probable metal transporter	PAM
PA1M	None	Y	1	3874207	A→G	0.064	intergenic	intergenic (+371/+447)	PA3463 → / ← PA3464	conserved hypothetical protein/hypothetical protein	PAM
PA1M	None	Y	1	3874468	C→A	0.051	intergenic	intergenic (+632/+186)	PA3463 → / ← PA3464	conserved hypothetical protein/hypothetical protein	PAM
PA1M	None	Y	1	2458035	Δ33 bp	0.237	deletion	coding (526‑558/771 nt)	pslD →	PslD	PAM
PA2	None	N	2	5638868	G→C	0.113	intergenic	intergenic (+64/‑81)	aceE → / → aceF	pyruvate dehydrogenase/dihydrolipoamide acetyltransferase	PA
PA2	None	N	2	1699880	(GTG)3→1	0.153	deletion	coding (63‑68/1566 nt)	aer ←	aerotaxis receptor Aer	PA
PA2	None	N	2	1167290	T→G	0.052	intergenic	intergenic (+20/‑198)	flgE → / → flgF	flagellar hook protein FlgE/flagellar basal‑body rod protein FlgF	PA
PA2	None	N	2	1558507	G→A	0.088	missense_variant	G113R (GGG→AGG)	lasR →	transcriptional regulator LasR	PA
PA2	None	N	2	1086618	G→A	0.05	gain_stop	Q160* (CAG→TAG)	mvfR ←	Transcriptional regulator MvfR	PA
PA2	None	N	2	1087104	C→G	0.051	intergenic	intergenic (‑9/‑739)	mvfR ← / → nadA	Transcriptional regulator MvfR/quinolinate synthetase A	PA
PA2	None	N	2	1373303	C→G	0.084	synonymous_variant	P181P (CCG→CCC)	PA1264 ←	probable transcriptional regulator	PA
PA2	None	N	2	1969032	A→T	0.067	missense_variant	F138Y (TTC→TAC)	PA1811 ←	probable solute‑binding protein	PA
PA2	None	N	2	2199745	C→G	0.055	intergenic	intergenic (+51/+17)	PA2010 → / ← liuE	probable transcriptional regulator/3‑hydroxy‑3‑methylglutaryl‑CoA lyase	PA
PA2	None	N	2	4438539	C→G	0.131	intergenic	intergenic (+10/‑80)	PA3958 → / → PA3959	hypothetical protein/hypothetical protein	PA
PA2	None	N	2	1078536	T→G	0.335	gain_stop	Y25* (TAT→TAG)	pqsA →	probable coenzyme A ligase	PA
PA2	None	N	2	4962241	T→G	0.083	intergenic	intergenic (‑54/+32)	sspA ← / ← PA4429	stringent starvation protein A/probable cytochrome c1 precursor	PA
PA2M	None	Y	2	196821	C→T	0.053	intergenic	intergenic (‑73/+190)	PA0172 ← / ← PA0173	hypothetical protein/probable methylesterase	PAM
PA2M	None	Y	2	1229087	C→T	0.051	missense_variant	G38S (GGC→AGC)	PA1137 ←	probable oxidoreductase	PAM
PA2M	None	Y	2	2916578	G→A	0.05	synonymous_variant	F57F (TTC→TTT)	PA2580 ←	conserved hypothetical protein	PAM
PA3	None	N	3	5638858	A→C	0.078	intergenic	intergenic (+54/‑91)	aceE → / → aceF	pyruvate dehydrogenase/dihydrolipoamide acetyltransferase	PA
PA3	None	N	3	5638868	G→C	0.087	intergenic	intergenic (+64/‑81)	aceE → / → aceF	pyruvate dehydrogenase/dihydrolipoamide acetyltransferase	PA
PA3	None	N	3	1698917	A→T	0.136	missense_variant	L344Q (CTG→CAG)	aer ←	aerotaxis receptor Aer	PA
PA3	None	N	3	201569	A→C	0.09	missense_variant	F24C (TTC→TGC)	aer2 ←	aerotaxis transducer Aer2	PA
PA3	None	N	3	1671916	A→C	0.072	missense_variant	E643A (GAG→GCG)	dnaX →	DNA polymerase subunits gamma and tau	PA
PA3	None	N	3	2003856	G→C	0.098	intergenic	intergenic (‑263/+12)	metH ← / ← PA1844	methionine synthase/hypothetical protein	PA
PA3	None	N	3	827372	T→G	0.054	intergenic	intergenic (‑73/+28)	PA0758 ← / ← PA0759	hypothetical protein/conserved hypothetical protein	PA
PA3	None	N	3	943639	T→A	0.064	missense_variant	E268V (GAA→GTA)	PA0863 ←	probable oxidoreductase	PA
PA3	None	N	3	1373303	C→G	0.115	synonymous_variant	P181P (CCG→CCC)	PA1264 ←	probable transcriptional regulator	PA
PA3	None	N	3	1554861	T→A	0.051	intergenic	intergenic (+15/‑151)	PA1428 → / → PA1429	conserved hypothetical protein/probable cation‑transporting P‑type ATPase	PA
PA3	None	N	3	2449770	Δ22 bp	0.867	frameshift_deletion	coding (975‑996/1212 nt)	PA2228 ←	hypothetical protein	PA
PA3	None	N	3	3917061	A→C	0.051	missense_variant	L51R (CTC→CGC)	PA3499 ←	hypothetical protein	PA
PA3	None	N	3	4588637	G→C	0.086	intergenic	intergenic (+147/+106)	PA4104 → / ← PA4105	conserved hypothetical protein/hypothetical protein	PA
PA3	None	N	3	5047279	A→T	0.06	missense_variant	*158C (TGA→TGT)	PA4508 →	probable transcriptional regulator	PA
PA3	None	N	3	4962241	T→G	0.075	intergenic	intergenic (‑54/+32)	sspA ← / ← PA4429	stringent starvation protein A/probable cytochrome c1 precursor	PA
PA3	None	N	3	4962249	G→C	0.214	intergenic	intergenic (‑62/+24)	sspA ← / ← PA4429	stringent starvation protein A/probable cytochrome c1 precursor	PA
PA3	None	N	3	424548	A→T	0.054	intergenic	intergenic (+32/‑122)	thiG → / → micA	thiamine biosynthesis protein, thiazole moiety/DNA mismatch repair protein MicA	PA
PA3M	None	Y	3	1087063	C→T	0.551	missense_variant	M11I (ATG→ATA)	mvfR ←	Transcriptional regulator MvfR	PAM
PA3M	None	Y	3	828639	A→C	0.213	missense_variant	K8T (AAA→ACA)	PA0760 →	conserved hypothetical protein	PAM
PA3M	None	Y	3	2041310	G→T	0.064	missense_variant	A1624S (GCC→TCC)	PA1874 →	hypothetical protein	PAM
PA3M	None	Y	3	2041319	T→A	0.053	missense_variant	S1627T (TCG→ACG)	PA1874 →	hypothetical protein	PAM
PA3M	None	Y	3	2081513	C→T	0.051	synonymous_variant	P100P (CCG→CCA)	PA1909 ←	hypothetical protein	PAM
PA3M	None	Y	3	2558550	C→G	0.067	intergenic	intergenic (+586/+368)	PA2319 → / ← gntR	probable transposase/transcriptional regulator GntR	PAM
PA3M	None	Y	3	3874207	A→G	0.074	intergenic	intergenic (+371/+447)	PA3463 → / ← PA3464	conserved hypothetical protein/hypothetical protein	PAM
PA3M	None	Y	3	4008875	G→C	0.07	intergenic	intergenic (+317/+63)	PA3576 → / ← PA3577	hypothetical protein/hypothetical protein	PAM
PA3M	None	Y	3	5563605	A→C	0.116	intergenic	intergenic (+318/‑360)	psd → / → PA4958	phosphatidylserine decarboxylase/hypothetical protein	PAM
PA3M	None	Y	3	4962249	G→C	0.299	intergenic	intergenic (‑62/+24)	sspA ← / ← PA4429	stringent starvation protein A/probable cytochrome c1 precursor	PAM
PA3M	None	Y	3	4150993	T→C	0.244	missense_variant	E451G (GAG→GGG)	wspA ←	probable chemotaxis transducer	PAM
PA4	None	N	4	5638858	A→C	0.067	intergenic	intergenic (+54/‑91)	aceE → / → aceF	pyruvate dehydrogenase/dihydrolipoamide acetyltransferase	PA
PA4	None	N	4	490405	T→G	0.066	missense_variant	Q85P (CAG→CCG)	codA ←	cytosine deaminase	PA
PA4	None	N	4	1671363	+CCGAGC	0.274	insertion	coding (1375/2046 nt)	dnaX →	DNA polymerase subunits gamma and tau	PA
PA4	None	N	4	5694509	T→G	0.116	intergenic	intergenic (+28/‑67)	hslU → / → PA5055	heat shock protein HslU/hypothetical protein	PA
PA4	None	N	4	1558385	T→G	0.09	missense_variant	V72G (GTC→GGC)	lasR →	transcriptional regulator LasR	PA
PA4	None	N	4	1086416	A→T	0.089	missense_variant	L227Q (CTG→CAG)	mvfR ←	Transcriptional regulator MvfR	PA
PA4	None	N	4	1086983	G→A	0.107	missense_variant	A38V (GCG→GTG)	mvfR ←	Transcriptional regulator MvfR	PA
PA4	None	N	4	1086985	Δ12 bp	0.055	deletion	coding (100‑111/999 nt)	mvfR ←	Transcriptional regulator MvfR	PA
PA4	None	N	4	1086987	(GCTGACCGCCGA)1→2	0.312	duplication	coding (109/999 nt)	mvfR ←	Transcriptional regulator MvfR	PA
PA4	None	N	4	411130	C→G	0.059	intergenic	intergenic (‑196/‑94)	PA0366 ← / → PA0367	probable aldehyde dehydrogenase/probable transcriptional regulator	PA
PA4	None	N	4	1373303	C→G	0.129	synonymous_variant	P181P (CCG→CCC)	PA1264 ←	probable transcriptional regulator	PA
PA4	None	N	4	3738975	T→A	0.076	missense_variant	D67E (GAT→GAA)	PA3329 →	hypothetical protein	PA
PA4	None	N	4	3860587	G→T	0.08	intergenic	intergenic (‑65/+88)	PA3454 ← / ← PA3455	probable acyl‑CoA thiolase/conserved hypothetical protein	PA
PA4	None	N	4	4388708	G→T	0.087	missense_variant	S7Y (TCC→TAC)	PA3919 ←	conserved hypothetical protein	PA
PA4	None	N	4	4438539	C→G	0.14	intergenic	intergenic (+10/‑80)	PA3958 → / → PA3959	hypothetical protein/hypothetical protein	PA
PA4	None	N	4	4438550	A→T	0.102	intergenic	intergenic (+21/‑69)	PA3958 → / → PA3959	hypothetical protein/hypothetical protein	PA
PA4	None	N	4	4448869	G→C	0.084	intergenic	intergenic (+651/+24)	PA3969 → / ← amn	conserved hypothetical protein/AMP nucleosidase	PA
PA4	None	N	4	4588637	G→C	0.115	intergenic	intergenic (+147/+106)	PA4104 → / ← PA4105	conserved hypothetical protein/hypothetical protein	PA
PA4	None	N	4	5431327	T→G	0.057	intergenic	intergenic (+189/+54)	PA4838 → / ← speA	hypothetical protein/biosynthetic arginine decarboxylase	PA
PA4	None	N	4	226476	G→C	0.067	missense_variant	A292P (GCC→CCC)	pntB →	pyridine nucleotide transhydrogenase, beta subunit	PA
PA4M	None	Y	4	1086983	G→A	0.798	missense_variant	A38V (GCG→GTG)	mvfR ←	Transcriptional regulator MvfR	PAM
PA4M	None	Y	4	2041319	T→A	0.061	missense_variant	S1627T (TCG→ACG)	PA1874 →	hypothetical protein	PAM
PA4M	None	Y	4	2041579	G→C	0.051	synonymous_variant	A1713A (GCG→GCC)	PA1874 →	hypothetical protein	PAM
PA4M	None	Y	4	3874322	G→A	0.056	intergenic	intergenic (+486/+332)	PA3463 → / ← PA3464	conserved hypothetical protein/hypothetical protein	PAM
PA4M	None	Y	4	5047279	A→T	0.082	missense_variant	*158C (TGA→TGT)	PA4508 →	probable transcriptional regulator	PAM
PA4M	None	Y	4	706186	T→G	0.634	missense_variant	T163P (ACC→CCC)	vfr ←	transcriptional regulator Vfr	PAM
PA5	None	N	5	460273	C→T	0.123	missense_variant	H2050Y (CAC→TAC)	chpA →	component of chemotactic signal transduction system	PA
PA5	None	N	5	495323	A→G	0.18	synonymous_variant	H311H (CAT→CAC)	dht ←	dihydropyrimidinase	PA
PA5	None	N	5	1086975	+GCTGACCGCCGA	0.12	insertion	coding (121/999 nt)	mvfR ←	Transcriptional regulator MvfR	PA
PA5	None	N	5	3874369	A→C	0.055	intergenic	intergenic (+533/+285)	PA3463 → / ← PA3464	conserved hypothetical protein/hypothetical protein	PA
PA5	None	N	5	5094732	Δ11 bp	0.277	frameshift_deletion	coding (1355‑1365/1593 nt)	pilS →	two‑component sensor PilS	PA
PA5	None	N	5	5101777	C→A	0.179	gain_stop	Y365* (TAC→TAA)	pilY1 →	type 4 fimbrial biogenesis protein PilY1	PA
PA5	None	N	5	4773496	+GCGCTC	0.157	insertion	coding (2983/4200 nt)	rpoC ←	DNA‑directed RNA polymerase beta* chain	PA
PA5	None	N	5	4962241	T→G	0.098	intergenic	intergenic (‑54/+32)	sspA ← / ← PA4429	stringent starvation protein A/probable cytochrome c1 precursor	PA
PA5M	None	Y	5	495323	A→G	0.177	synonymous_variant	H311H (CAT→CAC)	dht ←	dihydropyrimidinase	PAM
PA5M	None	Y	5	1671916	A→C	0.075	missense_variant	E643A (GAG→GCG)	dnaX →	DNA polymerase subunits gamma and tau	PAM
PA5M	None	Y	5	1086961	G→C	0.163	missense_variant	D45E (GAC→GAG)	mvfR ←	Transcriptional regulator MvfR	PAM
PA5M	None	Y	5	1348645	C→T	0.403	intergenic	intergenic (‑244/‑771)	PA1244 ← / → PA1245	hypothetical protein/hypothetical protein	PAM
PA6	None	N	6	5638868	G→C	0.107	intergenic	intergenic (+64/‑81)	aceE → / → aceF	pyruvate dehydrogenase/dihydrolipoamide acetyltransferase	PA
PA6	None	N	6	1086302	G→A	0.81	missense_variant	T265I (ACC→ATC)	mvfR ←	Transcriptional regulator MvfR	PA
PA6	None	N	6	1086985	Δ12 bp	0.095	deletion	coding (100‑111/999 nt)	mvfR ←	Transcriptional regulator MvfR	PA
PA6	None	N	6	5676046	T→G	0.086	missense_variant	T605P (ACC→CCC)	pilQ ←	Type 4 fimbrial biogenesis outer membrane protein PilQ precursor	PA
PA6	None	N	6	5102487	Δ4 bp	0.299	frameshift_deletion	coding (1805‑1808/3486 nt)	pilY1 →	type 4 fimbrial biogenesis protein PilY1	PA
PA6	None	N	6	1657350	C→T	0.076	synonymous_variant	A132A (GCG→GCA)	xdhB ←	xanthine dehydrogenase	PA
PA6M	None	Y	6	2452062	C→A	0.403	missense_variant	S119Y (TCC→TAC)	PA2229 →	conserved hypothetical protein	PAM
PA6M	None	Y	6	3874583	C→A	0.066	intergenic	intergenic (+747/+71)	PA3463 → / ← PA3464	conserved hypothetical protein/hypothetical protein	PAM
SA1	SA	N	1	5638858	A→C	0.109	intergenic	intergenic (+54/‑91)	aceE → / → aceF	pyruvate dehydrogenase/dihydrolipoamide acetyltransferase	SA
SA1	SA	N	1	1671916	A→C	0.082	missense_variant	E643A (GAG→GCG)	dnaX →	DNA polymerase subunits gamma and tau	SA
SA1	SA	N	1	1086985	Δ12 bp	0.15	deletion	coding (100‑111/999 nt)	mvfR ←	Transcriptional regulator MvfR	SA
SA1	SA	N	1	821682	G→C	0.05	missense_variant	L58V (CTG→GTG)	PA0753 ←	hypothetical protein	SA
SA1	SA	N	1	1373306	A→T	0.052	missense_variant	D180E (GAT→GAA)	PA1264 ←	probable transcriptional regulator	SA
SA1	SA	N	1	1969032	A→T	0.052	missense_variant	F138Y (TTC→TAC)	PA1811 ←	probable solute‑binding protein	SA
SA1	SA	N	1	3862567	G→C	0.06	missense_variant	A87P (GCG→CCG)	PA3456 →	hypothetical protein	SA
SA1	SA	N	1	3874207	A→G	0.057	intergenic	intergenic (+371/+447)	PA3463 → / ← PA3464	conserved hypothetical protein/hypothetical protein	SA
SA1	SA	N	1	3874254	A→C	0.059	intergenic	intergenic (+418/+400)	PA3463 → / ← PA3464	conserved hypothetical protein/hypothetical protein	SA
SA1	SA	N	1	4388708	G→C	0.084	missense_variant	S7C (TCC→TGC)	PA3919 ←	conserved hypothetical protein	SA
SA1	SA	N	1	4448869	G→C	0.086	intergenic	intergenic (+651/+24)	PA3969 → / ← amn	conserved hypothetical protein/AMP nucleosidase	SA
SA1	SA	N	1	4588637	G→C	0.098	intergenic	intergenic (+147/+106)	PA4104 → / ← PA4105	conserved hypothetical protein/hypothetical protein	SA
SA1	SA	N	1	4737225	T→G	0.059	missense_variant	Q1296P (CAG→CCG)	pchE ←	dihydroaeruginoic acid synthetase	SA
SA1	SA	N	1	226475	A→C	0.061	missense_variant	E291D (GAA→GAC)	pntB →	pyridine nucleotide transhydrogenase, beta subunit	SA
SA1M	SA	Y	1	5638858	A→C	0.073	intergenic	intergenic (+54/‑91)	aceE → / → aceF	pyruvate dehydrogenase/dihydrolipoamide acetyltransferase	SAM
SA1M	SA	Y	1	5638868	G→C	0.095	intergenic	intergenic (+64/‑81)	aceE → / → aceF	pyruvate dehydrogenase/dihydrolipoamide acetyltransferase	SAM
SA1M	SA	Y	1	490405	T→G	0.055	missense_variant	Q85P (CAG→CCG)	codA ←	cytosine deaminase	SAM
SA1M	SA	Y	1	1086985	Δ12 bp	0.05	deletion	coding (100‑111/999 nt)	mvfR ←	Transcriptional regulator MvfR	SAM
SA1M	SA	Y	1	493206	T→G	0.057	missense_variant	D51A (GAC→GCC)	PA0439 ←	probable oxidoreductase	SAM
SA1M	SA	Y	1	1373303	C→G	0.096	synonymous_variant	P181P (CCG→CCC)	PA1264 ←	probable transcriptional regulator	SAM
SA1M	SA	Y	1	1798447	C→T	0.099	synonymous_variant	S236S (TCG→TCA)	PA1651 ←	probable transporter	SAM
SA1M	SA	Y	1	2037583	T→C	0.052	synonymous_variant	G381G (GGT→GGC)	PA1874 →	hypothetical protein	SAM
SA1M	SA	Y	1	3808318	T→A	0.054	missense_variant	*162C (TGA→TGT)	PA3403 ←	hypothetical protein	SAM
SA1M	SA	Y	1	3874369	A→C	0.077	intergenic	intergenic (+533/+285)	PA3463 → / ← PA3464	conserved hypothetical protein/hypothetical protein	SAM
SA1M	SA	Y	1	4274911	T→A	0.107	missense_variant	L137H (CTC→CAC)	PA3818 →	extragenic suppressor protein SuhB	SAM
SA1M	SA	Y	1	4399434	T→G	0.054	missense_variant	S170R (AGC→CGC)	PA3924 ←	probable medium‑chain acyl‑CoA ligase	SAM
SA1M	SA	Y	1	4448869	G→C	0.097	intergenic	intergenic (+651/+24)	PA3969 → / ← amn	conserved hypothetical protein/AMP nucleosidase	SAM
SA1M	SA	Y	1	4736660	C→G	0.065	missense_variant	A47P (GCC→CCC)	pchF ←	pyochelin synthetase	SAM
SA1M	SA	Y	1	2636688	T→G	0.087	missense_variant	E706D (GAA→GAC)	pvdQ ←	3‑oxo‑C12‑homoserine lactone acylase PvdQ	SAM
SA2	SA	N	2	4933463	T→G	0.082	missense_variant	E86A (GAG→GCG)	argJ ←	glutamate N‑acetyltransferase	SA
SA2	SA	N	2	821679	T→A	0.068	missense_variant	I59F (ATC→TTC)	PA0753 ←	hypothetical protein	SA
SA2	SA	N	2	1303419	A→T	0.129	intergenic	intergenic (+106/‑38)	PA1202 → / → PA1203	probable hydrolase/hypothetical protein	SA
SA2	SA	N	2	2526209	T→G	0.059	missense_variant	S357R (AGC→CGC)	PA2296 ←	hypothetical protein	SA
SA2	SA	N	2	5431327	T→G	0.061	intergenic	intergenic (+189/+54)	PA4838 → / ← speA	hypothetical protein/biosynthetic arginine decarboxylase	SA
SA2	SA	N	2	1961168	C→A	0.07	intergenic	intergenic (+40/+59)	ppiD → / ← fabI	peptidyl‑prolyl cis‑trans isomerase D/NADH‑dependent enoyl‑ACP reductase	SA
SA2M	SA	Y	2	109055	G→T	0.064	missense_variant	G279W (GGG→TGG)	clpV1 →	ClpV1	SAM
SA2M	SA	Y	2	687994	C→T	0.053	gain_stop	Q6* (CAG→TAG)	PA0629 →	conserved hypothetical protein	SAM
SA2M	SA	Y	2	872832	C→T	0.054	synonymous_variant	P8P (CCG→CCA)	PA0794 ←	probable aconitate hydratase	SAM
SA2M	SA	Y	2	1371536	G→T	0.053	missense_variant	A55D (GCC→GAC)	PA1262 ←	probable major facilitator superfamily (MFS) transporter	SAM
SA2M	SA	Y	2	2194428	C→T	0.051	missense_variant	G328D (GGC→GAC)	PA2006 ←	probable major facilitator superfamily (MFS) transporter	SAM
SA2M	SA	Y	2	2280731	G→T	0.081	missense_variant	S283Y (TCC→TAC)	PA2075 ←	hypothetical protein	SAM
SA2M	SA	Y	2	2333543	G→A	0.051	missense_variant	R111C (CGC→TGC)	PA2121 ←	probable transcriptional regulator	SAM
SA2M	SA	Y	2	2553520	C→A	0.052	missense_variant	A111S (GCG→TCG)	PA2315 ←	hypothetical protein	SAM
SA2M	SA	Y	2	3116419	C→T	0.062	intergenic	intergenic (+786/‑235)	PA2754 → / → eco	conserved hypothetical protein/ecotin precursor	SAM
SA2M	SA	Y	2	3210905	C→T	0.061	gain_stop	Q309* (CAA→TAA)	PA2858 →	conserved hypothetical protein	SAM
SA2M	SA	Y	2	3874569	G→A	0.065	intergenic	intergenic (+733/+85)	PA3463 → / ← PA3464	conserved hypothetical protein/hypothetical protein	SAM
SA2M	SA	Y	2	1861177	C→T	0.055	missense_variant	A562V (GCC→GTC)	pscC →	Type III secretion outer membrane protein PscC precursor	SAM
SA3	SA	N	3	1698917	A→T	0.374	missense_variant	L344Q (CTG→CAG)	aer ←	aerotaxis receptor Aer	SA
SA3	SA	N	3	1086971	A→C	0.111	missense_variant	L42R (CTG→CGG)	mvfR ←	Transcriptional regulator MvfR	SA
SA3	SA	N	3	2037325	C→T	0.05	synonymous_variant	G295G (GGC→GGT)	PA1874 →	hypothetical protein	SA
SA3	SA	N	3	2037583	T→C	0.059	synonymous_variant	G381G (GGT→GGC)	PA1874 →	hypothetical protein	SA
SA3	SA	N	3	2039330	G→T	0.056	missense_variant	G964C (GGC→TGC)	PA1874 →	hypothetical protein	SA
SA3	SA	N	3	5163770	A→C	0.09	intergenic	intergenic (‑31/+18)	PA4605 ← / ← PA4606	conserved hypothetical protein/conserved hypothetical protein	SA
SA3M	SA	Y	3	5922894	+GGCCGGG	0.104	insertion	coding (397/747 nt)	algR ←	alginate biosynthesis regulatory protein AlgR	SAM
SA3M	SA	Y	3	5108497	T→A	0.071	missense_variant	Q429L (CAG→CTG)	ileS ←	isoleucyl‑tRNA synthetase	SAM
SA3M	SA	Y	3	2823901	T→G	0.077	missense_variant	K7T (AAA→ACA)	opdT ←	tyrosine porin OpdT	SAM
SA3M	SA	Y	3	1373303	C→G	0.111	synonymous_variant	P181P (CCG→CCC)	PA1264 ←	probable transcriptional regulator	SAM
SA3M	SA	Y	3	2041319	T→A	0.051	missense_variant	S1627T (TCG→ACG)	PA1874 →	hypothetical protein	SAM
SA3M	SA	Y	3	4448869	G→C	0.1	intergenic	intergenic (+651/+24)	PA3969 → / ← amn	conserved hypothetical protein/AMP nucleosidase	SAM
SA3M	SA	Y	3	5502042	A→C	0.062	missense_variant	L211V (TTG→GTG)	PA4903 ←	probable major facilitator superfamily (MFS) transporter	SAM
SA4	SA	N	4	5638858	A→C	0.107	intergenic	intergenic (+54/‑91)	aceE → / → aceF	pyruvate dehydrogenase/dihydrolipoamide acetyltransferase	SA
SA4	SA	N	4	1698742	Δ1 bp	0.328	frameshift_deletion	coding (1206/1566 nt)	aer ←	aerotaxis receptor Aer	SA
SA4	SA	N	4	1671916	A→C	0.081	missense_variant	E643A (GAG→GCG)	dnaX →	DNA polymerase subunits gamma and tau	SA
SA4	SA	N	4	5694505	A→C	0.15	intergenic	intergenic (+24/‑71)	hslU → / → PA5055	heat shock protein HslU/hypothetical protein	SA
SA4	SA	N	4	564591	A→C	0.103	intergenic	intergenic (+17/‑323)	PA0505 → / → PA0506	hypothetical protein/probable acyl‑CoA dehydrogenase	SA
SA4	SA	N	4	2526209	T→G	0.05	missense_variant	S357R (AGC→CGC)	PA2296 ←	hypothetical protein	SA
SA4	SA	N	4	2886428	T→A	0.079	missense_variant	E42V (GAG→GTG)	PA2553 ←	probable acyl‑CoA thiolase	SA
SA4	SA	N	4	3136992	T→G	0.126	intergenic	intergenic (‑29/+52)	PA2778 ← / ← PA2779	hypothetical protein/hypothetical protein	SA
SA4	SA	N	4	3589310	T→G	0.052	intergenic	intergenic (‑39/+42)	PA3196 ← / ← PA3197	hypothetical protein/hypothetical protein	SA
SA4	SA	N	4	3759982	T→A	0.051	intergenic	intergenic (‑301/+14)	PA3347 ← / ← PA3348	hypothetical protein/probable chemotaxis protein methyltransferase	SA
SA4	SA	N	4	3932723	T→A	0.078	gain_stop	K199* (AAG→TAG)	PA3516 ←	probable lyase	SA
SA4	SA	N	4	4438546	C→G	0.066	intergenic	intergenic (+17/‑73)	PA3958 → / → PA3959	hypothetical protein/hypothetical protein	SA
SA4	SA	N	4	4471512	A→T	0.058	missense_variant	E37V (GAA→GTA)	PA3990 →	conserved hypothetical protein	SA
SA4	SA	N	4	4588637	G→C	0.073	intergenic	intergenic (+147/+106)	PA4104 → / ← PA4105	conserved hypothetical protein/hypothetical protein	SA
SA4	SA	N	4	4614941	T→G	0.051	synonymous_variant	R306R (CGT→CGG)	PA4126 →	probable major facilitator superfamily (MFS) transporter	SA
SA4	SA	N	4	4962249	G→C	0.206	intergenic	intergenic (‑62/+24)	sspA ← / ← PA4429	stringent starvation protein A/probable cytochrome c1 precursor	SA
SA4M	SA	Y	4	5638868	G→C	0.091	intergenic	intergenic (+64/‑81)	aceE → / → aceF	pyruvate dehydrogenase/dihydrolipoamide acetyltransferase	SAM
SA4M	SA	Y	4	1671363	+CCGAGC	0.227	insertion	coding (1375/2046 nt)	dnaX →	DNA polymerase subunits gamma and tau	SAM
SA4M	SA	Y	4	959409	A→T	0.063	intergenic	intergenic (+59/+75)	PA0876 → / ← PA0877	probable transcriptional regulator/probable transcriptional regulator	SAM
SA4M	SA	Y	4	2037583	T→C	0.066	synonymous_variant	G381G (GGT→GGC)	PA1874 →	hypothetical protein	SAM
SA4M	SA	Y	4	4438547	T→G	0.096	intergenic	intergenic (+18/‑72)	PA3958 → / → PA3959	hypothetical protein/hypothetical protein	SAM
SA4M	SA	Y	4	5642853	Δ114 bp	0.207	deletion	coding (1844‑1957/2700 nt)	PA5017 →	conserved hypothetical protein	SAM
SA5	SA	N	5	495323	A→G	0.113	synonymous_variant	H311H (CAT→CAC)	dht ←	dihydropyrimidinase	SA
SA5	SA	N	5	1086961	G→C	0.118	missense_variant	D45E (GAC→GAG)	mvfR ←	Transcriptional regulator MvfR	SA
SA5	SA	N	5	1086987	(GCTGACCGCCGA)1→2	0.068	duplication	coding (109/999 nt)	mvfR ←	Transcriptional regulator MvfR	SA
SA5	SA	N	5	5187434	A→G	0.093	synonymous_variant	D1814D (GAT→GAC)	PA4625 ←	hypothetical protein	SA
SA5	SA	N	5	1844903	+GTTGGC	0.644	insertion	coding (351/1110 nt)	pscP ←	translocation protein in type III secretion	SA
SA5M	SA	Y	5	201568	G→C	0.089	missense_variant	F24L (TTC→TTG)	aer2 ←	aerotaxis transducer Aer2	SAM
SA5M	SA	Y	5	1671916	A→C	0.056	missense_variant	E643A (GAG→GCG)	dnaX →	DNA polymerase subunits gamma and tau	SAM
SA5M	SA	Y	5	1183213	C→G	0.132	missense_variant	N52K (AAC→AAG)	fliC →	flagellin type B	SAM
SA5M	SA	Y	5	4545352	T→G	0.053	intergenic	intergenic (+47/+394)	oprG → / ← PA4068	Outer membrane protein OprG precursor/probable epimerase	SAM
SA5M	SA	Y	5	1969032	A→T	0.057	missense_variant	F138Y (TTC→TAC)	PA1811 ←	probable solute‑binding protein	SAM
SA5M	SA	Y	5	2241778	T→G	0.053	missense_variant	L25R (CTT→CGT)	PA2048 →	hypothetical protein	SAM
SA5M	SA	Y	5	2415875	A→G	0.203	missense_variant	Q72R (CAA→CGA)	PA2196 →	probable transcriptional regulator	SAM
SA5M	SA	Y	5	2415877	C→G	0.201	missense_variant	R73G (CGC→GGC) ‡	PA2196 →	probable transcriptional regulator	SAM
SA5M	SA	Y	5	2415878	G→T	0.202	missense_variant	R73L (CGC→CTC) ‡	PA2196 →	probable transcriptional regulator	SAM
SA5M	SA	Y	5	3109771	C→G	0.07	missense_variant	R252P (CGC→CCC)	PA2748 ←	probable methionine aminopeptidase	SAM
SA5M	SA	Y	5	4438550	A→T	0.124	intergenic	intergenic (+21/‑69)	PA3958 → / → PA3959	hypothetical protein/hypothetical protein	SAM
SA5M	SA	Y	5	4448869	G→C	0.104	intergenic	intergenic (+651/+24)	PA3969 → / ← amn	conserved hypothetical protein/AMP nucleosidase	SAM
SA5M	SA	Y	5	4588637	G→C	0.092	intergenic	intergenic (+147/+106)	PA4104 → / ← PA4105	conserved hypothetical protein/hypothetical protein	SAM
SA5M	SA	Y	5	5047277	T→G	0.061	missense_variant	*158G (TGA→GGA) ‡	PA4508 →	probable transcriptional regulator	SAM
SA5M	SA	Y	5	5047279	A→T	0.061	missense_variant	*158C (TGA→TGT) ‡	PA4508 →	probable transcriptional regulator	SAM
SA5M	SA	Y	5	4737225	T→G	0.064	missense_variant	Q1296P (CAG→CCG)	pchE ←	dihydroaeruginoic acid synthetase	SAM
SA5M	SA	Y	5	226473	G→C	0.05	missense_variant	E291Q (GAA→CAA)	pntB →	pyridine nucleotide transhydrogenase, beta subunit	SAM
SA5M	SA	Y	5	226476	G→C	0.093	missense_variant	A292P (GCC→CCC)	pntB →	pyridine nucleotide transhydrogenase, beta subunit	SAM
SA5M	SA	Y	5	6188139	T→A	0.088	intergenic	intergenic (+262/+27)	thrB → / ← nrdJb	homoserine kinase/NrdJb	SAM
SA6	SA	N	6	1086302	G→A	0.126	missense_variant	T265I (ACC→ATC)	mvfR ←	Transcriptional regulator MvfR	SA
SA6	SA	N	6	6188139	T→A	0.139	intergenic	intergenic (+262/+27)	thrB → / ← nrdJb	homoserine kinase/NrdJb	SA
SA6M	SA	Y	6	5638868	G→C	0.109	intergenic	intergenic (+64/‑81)	aceE → / → aceF	pyruvate dehydrogenase/dihydrolipoamide acetyltransferase	SAM
SA6M	SA	Y	6	201568	G→C	0.051	missense_variant	F24L (TTC→TTG)	aer2 ←	aerotaxis transducer Aer2	SAM
SA6M	SA	Y	6	5329832	C→A	0.152	missense_variant	D40Y (GAT→TAT)	infB ←	translation initiation factor IF‑2	SAM
SA6M	SA	Y	6	65705	A→C	0.052	intergenic	intergenic (+226/‑598)	PA0050 → / → phzH	hypothetical protein/potential phenazine‑modifying enzyme	SAM
SA6M	SA	Y	6	1373303	C→G	0.122	synonymous_variant	P181P (CCG→CCC)	PA1264 ←	probable transcriptional regulator	SAM
SA6M	SA	Y	6	2480762	T→A	0.051	intergenic	intergenic (+18/‑82)	PA2252 → / → ansA	probable AGCS sodium/alanine/glycine symporter/L‑asparaginase I	SAM
SA6M	SA	Y	6	3217912	T→G	0.091	missense_variant	S170R (AGC→CGC)	PA2865 ←	probable glycosylase	SAM
SA6M	SA	Y	6	4448869	G→C	0.062	intergenic	intergenic (+651/+24)	PA3969 → / ← amn	conserved hypothetical protein/AMP nucleosidase	SAM
SA6M	SA	Y	6	4471512	A→T	0.059	missense_variant	E37V (GAA→GTA)	PA3990 →	conserved hypothetical protein	SAM
SA6M	SA	Y	6	4588637	G→C	0.074	intergenic	intergenic (+147/+106)	PA4104 → / ← PA4105	conserved hypothetical protein/hypothetical protein	SAM
SA6M	SA	Y	6	4875273	T→G	0.054	intergenic	intergenic (‑28/+33)	PA4345 ← / ← PA4346	hypothetical protein/hypothetical protein	SAM
SA6M	SA	Y	6	5431327	T→G	0.051	intergenic	intergenic (+189/+54)	PA4838 → / ← speA	hypothetical protein/biosynthetic arginine decarboxylase	SAM
SA6M	SA	Y	6	260601	C→G	0.101	missense_variant	A273G (GCC→GGC)	pcaB →	3‑carboxy‑cis,cis‑muconate cycloisomerase	SAM
SA6M	SA	Y	6	4737225	T→G	0.058	missense_variant	Q1296P (CAG→CCG)	pchE ←	dihydroaeruginoic acid synthetase	SAM
SA6M	SA	Y	6	226476	G→C	0.084	missense_variant	A292P (GCC→CCC)	pntB →	pyridine nucleotide transhydrogenase, beta subunit	SAM
SA6M	SA	Y	6	4962241	T→G	0.068	intergenic	intergenic (‑54/+32)	sspA ← / ← PA4429	stringent starvation protein A/probable cytochrome c1 precursor	SAM
SM1	SM	N	1	1086985	Δ12 bp	0.163	deletion	coding (100‑111/999 nt)	mvfR ←	Transcriptional regulator MvfR	SM
SM1	SM	N	1	1408406	+GTGGTG	0.668	insertion	coding (526/981 nt)	PA1297 ←	probable metal transporter	SM
SM1	SM	N	1	1408407	Δ3 bp	0.078	deletion	coding (523‑525/981 nt)	PA1297 ←	probable metal transporter	SM
SM1	SM	N	1	2408236	Δ3 bp	0.053	deletion	coding (610‑612/1167 nt)	PA2188 ←	probable alcohol dehydrogenase (Zn‑dependent)	SM
SM1	SM	N	1	3874369	A→C	0.114	intergenic	intergenic (+533/+285)	PA3463 → / ← PA3464	conserved hypothetical protein/hypothetical protein	SM
SM1	SM	N	1	4827582	A→G	0.29	missense_variant	L263P (CTG→CCG)	tadZ ←	TadZ	SM
SM1	SM	N	1	4827672	G→A	0.125	missense_variant	T233I (ACC→ATC)	tadZ ←	TadZ	SM
SM1M	SM	Y	1	1086985	Δ12 bp	0.195	deletion	coding (100‑111/999 nt)	mvfR ←	Transcriptional regulator MvfR	SMM
SM1M	SM	Y	1	1408407	Δ3 bp	0.084	deletion	coding (523‑525/981 nt)	PA1297 ←	probable metal transporter	SMM
SM1M	SM	Y	1	2010872	C→T	0.281	intergenic	intergenic (‑121/‑128)	PA1850 ← / → PA1851	probable transcriptional regulator/hypothetical protein	SMM
SM1M	SM	Y	1	2041319	T→A	0.058	missense_variant	S1627T (TCG→ACG)	PA1874 →	hypothetical protein	SMM
SM1M	SM	Y	1	2041516	T→C	0.065	synonymous_variant	D1692D (GAT→GAC)	PA1874 →	hypothetical protein	SMM
SM1M	SM	Y	1	5047276	C→G	0.085	synonymous_variant	G157G (GGC→GGG)	PA4508 →	probable transcriptional regulator	SMM
SM2	SM	N	2	1408407	Δ3 bp	0.053	deletion	coding (523‑525/981 nt)	PA1297 ←	probable metal transporter	SM
SM2	SM	N	2	2037583	T→C	0.06	synonymous_variant	G381G (GGT→GGC)	PA1874 →	hypothetical protein	SM
SM2	SM	N	2	2041319	T→A	0.052	missense_variant	S1627T (TCG→ACG)	PA1874 →	hypothetical protein	SM
SM2	SM	N	2	2041516	T→C	0.054	synonymous_variant	D1692D (GAT→GAC)	PA1874 →	hypothetical protein	SM
SM2	SM	N	2	2689790	A→C	0.099	missense_variant	Q75P (CAG→CCG)	PA2406 →	hypothetical protein	SM
SM2	SM	N	2	3874468	C→A	0.052	intergenic	intergenic (+632/+186)	PA3463 → / ← PA3464	conserved hypothetical protein/hypothetical protein	SM
SM2	SM	N	2	4408891	T→A	0.144	intergenic	intergenic (+157/‑33)	PA3932 → / → PA3933	probable transcriptional regulator/probable choline transporter	SM
SM2	SM	N	2	226475	A→C	0.078	missense_variant	E291D (GAA→GAC)	pntB →	pyridine nucleotide transhydrogenase, beta subunit	SM
SM2	SM	N	2	4827579	C→T	0.526	missense_variant	S264N (AGC→AAC)	tadZ ←	TadZ	SM
SM2M	SM	Y	2	5638868	G→C	0.076	intergenic	intergenic (+64/‑81)	aceE → / → aceF	pyruvate dehydrogenase/dihydrolipoamide acetyltransferase	SMM
SM2M	SM	Y	2	201568	G→C	0.076	missense_variant	F24L (TTC→TTG)	aer2 ←	aerotaxis transducer Aer2	SMM
SM2M	SM	Y	2	4933463	T→G	0.071	missense_variant	E86A (GAG→GCG)	argJ ←	glutamate N‑acetyltransferase	SMM
SM2M	SM	Y	2	4894590	Δ57 bp	0.071	deletion	coding (132‑188/2064 nt)	bifA →	BifA	SMM
SM2M	SM	Y	2	1671363	+CCGAGC	0.221	insertion	coding (1375/2046 nt)	dnaX →	DNA polymerase subunits gamma and tau	SMM
SM2M	SM	Y	2	1671916	A→C	0.078	missense_variant	E643A (GAG→GCG)	dnaX →	DNA polymerase subunits gamma and tau	SMM
SM2M	SM	Y	2	417866	+CCGAGC	0.062	insertion	coding (340/1368 nt)	ftsY →	signal recognition particle receptor FtsY	SMM
SM2M	SM	Y	2	417867	Δ6 bp	0.074	deletion	coding (341‑346/1368 nt)	ftsY →	signal recognition particle receptor FtsY	SMM
SM2M	SM	Y	2	2003856	G→C	0.075	intergenic	intergenic (‑263/+12)	metH ← / ← PA1844	methionine synthase/hypothetical protein	SMM
SM2M	SM	Y	2	411130	C→G	0.05	intergenic	intergenic (‑196/‑94)	PA0366 ← / → PA0367	probable aldehyde dehydrogenase/probable transcriptional regulator	SMM
SM2M	SM	Y	2	1303419	A→T	0.11	intergenic	intergenic (+106/‑38)	PA1202 → / → PA1203	probable hydrolase/hypothetical protein	SMM
SM2M	SM	Y	2	1373306	A→T	0.101	missense_variant	D180E (GAT→GAA)	PA1264 ←	probable transcriptional regulator	SMM
SM2M	SM	Y	2	1408407	Δ3 bp	0.051	deletion	coding (523‑525/981 nt)	PA1297 ←	probable metal transporter	SMM
SM2M	SM	Y	2	3137809	C→T	0.145	intergenic	intergenic (‑367/‑41)	PA2779 ← / → PA2780	hypothetical protein/hypothetical protein	SMM
SM2M	SM	Y	2	3205830	A→C	0.059	missense_variant	F142V (TTC→GTC)	PA2852 ←	hypothetical protein	SMM
SM2M	SM	Y	2	3589310	T→G	0.056	intergenic	intergenic (‑39/+42)	PA3196 ← / ← PA3197	hypothetical protein/hypothetical protein	SMM
SM2M	SM	Y	2	3932723	T→A	0.058	gain_stop	K199* (AAG→TAG)	PA3516 ←	probable lyase	SMM
SM2M	SM	Y	2	4438546	C→G	0.064	intergenic	intergenic (+17/‑73)	PA3958 → / → PA3959	hypothetical protein/hypothetical protein	SMM
SM2M	SM	Y	2	4471512	A→T	0.061	missense_variant	E37V (GAA→GTA)	PA3990 →	conserved hypothetical protein	SMM
SM2M	SM	Y	2	4588600	A→T	0.061	intergenic	intergenic (+110/+143)	PA4104 → / ← PA4105	conserved hypothetical protein/hypothetical protein	SMM
SM2M	SM	Y	2	4588637	G→C	0.064	intergenic	intergenic (+147/+106)	PA4104 → / ← PA4105	conserved hypothetical protein/hypothetical protein	SMM
SM2M	SM	Y	2	5047276	C→G	0.056	synonymous_variant	G157G (GGC→GGG)	PA4508 →	probable transcriptional regulator	SMM
SM2M	SM	Y	2	226475	A→C	0.06	missense_variant	E291D (GAA→GAC)	pntB →	pyridine nucleotide transhydrogenase, beta subunit	SMM
SM2M	SM	Y	2	1078543	C→T	0.077	gain_stop	Q28* (CAG→TAG)	pqsA →	probable coenzyme A ligase	SMM
SM2M	SM	Y	2	424548	A→T	0.054	intergenic	intergenic (+32/‑122)	thiG → / → micA	thiamine biosynthesis protein, thiazole moiety/DNA mismatch repair protein MicA	SMM
SM2M	SM	Y	2	6188139	T→A	0.094	intergenic	intergenic (+262/+27)	thrB → / ← nrdJb	homoserine kinase/NrdJb	SMM
SM2M	SM	Y	2	2449287	C→T	0.138	missense_variant	A87T (GCC→ACC)	vqsM ←	AraC‑type transcriptional regulator VqsM	SMM
SM3	SM	N	3	1699687	G→T	0.232	gain_stop	C87* (TGC→TGA)	aer ←	aerotaxis receptor Aer	SM
SM3	SM	N	3	1167290	T→G	0.077	intergenic	intergenic (+20/‑198)	flgE → / → flgF	flagellar hook protein FlgE/flagellar basal‑body rod protein FlgF	SM
SM3	SM	N	3	4844020	Δ33 bp	0.112	deletion	coding (209‑241/375 nt)	mvaT →	transcriptional regulator MvaT, P16 subunit	SM
SM3	SM	N	3	3874458	G→A	0.065	intergenic	intergenic (+622/+196)	PA3463 → / ← PA3464	conserved hypothetical protein/hypothetical protein	SM
SM3	SM	N	3	3874468	C→A	0.062	intergenic	intergenic (+632/+186)	PA3463 → / ← PA3464	conserved hypothetical protein/hypothetical protein	SM
SM3	SM	N	3	4448869	G→C	0.101	intergenic	intergenic (+651/+24)	PA3969 → / ← amn	conserved hypothetical protein/AMP nucleosidase	SM
SM3	SM	N	3	5047279	A→T	0.081	missense_variant	*158C (TGA→TGT)	PA4508 →	probable transcriptional regulator	SM
SM3	SM	N	3	4217366	G→A	0.067	missense_variant	A692V (GCC→GTC)	purL ←	phosphoribosylformylglycinamidine synthase	SM
SM3	SM	N	3	4827569	C→A	0.317	missense_variant	L267F (TTG→TTT)	tadZ ←	TadZ	SM
SM3	SM	N	3	4828177	C→T	0.082	missense_variant	A65T (GCG→ACG)	tadZ ←	TadZ	SM
SM3M	SM	Y	3	4933463	T→G	0.074	missense_variant	E86A (GAG→GCG)	argJ ←	glutamate N‑acetyltransferase	SMM
SM3M	SM	Y	3	194375	Δ12 bp	0.054	deletion	coding (363‑374/543 nt)	PA0171 ←	hypothetical protein	SMM
SM3M	SM	Y	3	1335557	A→C	0.08	intergenic	intergenic (‑104/‑88)	PA1234 ← / → PA1235	hypothetical protein/probable transcriptional regulator	SMM
SM3M	SM	Y	3	1373303	C→G	0.148	synonymous_variant	P181P (CCG→CCC)	PA1264 ←	probable transcriptional regulator	SMM
SM3M	SM	Y	3	1766243	T→A	0.061	intergenic	intergenic (+38/‑42)	PA1622 → / → PA1623	probable hydrolase/conserved hypothetical protein	SMM
SM3M	SM	Y	3	2039331	G→C	0.05	missense_variant	G964A (GGC→GCC)	PA1874 →	hypothetical protein	SMM
SM3M	SM	Y	3	3874135	T→A	0.075	intergenic	intergenic (+299/+519)	PA3463 → / ← PA3464	conserved hypothetical protein/hypothetical protein	SMM
SM3M	SM	Y	3	4399434	T→G	0.059	missense_variant	S170R (AGC→CGC)	PA3924 ←	probable medium‑chain acyl‑CoA ligase	SMM
SM3M	SM	Y	3	4448855	C→G	0.926	intergenic	intergenic (+637/+38)	PA3969 → / ← amn	conserved hypothetical protein/AMP nucleosidase	SMM
SM3M	SM	Y	3	4448869	G→C	0.091	intergenic	intergenic (+651/+24)	PA3969 → / ← amn	conserved hypothetical protein/AMP nucleosidase	SMM
SM3M	SM	Y	3	4588637	G→C	0.065	intergenic	intergenic (+147/+106)	PA4104 → / ← PA4105	conserved hypothetical protein/hypothetical protein	SMM
SM3M	SM	Y	3	1844903	+GTTGGC	0.727	insertion	coding (351/1110 nt)	pscP ←	translocation protein in type III secretion	SMM
SM3M	SM	Y	3	6188139	T→A	0.083	intergenic	intergenic (+262/+27)	thrB → / ← nrdJb	homoserine kinase/NrdJb	SMM
SM4	SM	N	4	1698449	Δ77 bp	0.211	frameshift_deletion	coding (1423‑1499/1566 nt)	aer ←	aerotaxis receptor Aer	SM
SM4	SM	N	4	1086312	C→T	0.122	missense_variant	G262S (GGC→AGC)	mvfR ←	Transcriptional regulator MvfR	SM
SM4	SM	N	4	2096119	C→A	0.051	missense_variant	A80S (GCC→TCC)	nrdD ←	class III (anaerobic) ribonucleoside‑triphosphate reductase subunit, NrdD	SM
SM4	SM	N	4	1470696	C→T	0.05	missense_variant	E95K (GAG→AAG)	PA1358 ←	hypothetical protein	SM
SM4	SM	N	4	1552021	Δ1 bp	0.057	frameshift_deletion	coding (1038/1617 nt)	PA1425 →	probable ATP‑binding component of ABC transporter	SM
SM4	SM	N	4	2944207	C→T	0.064	intergenic	intergenic (‑292/+48)	PA2600 ← / ← PA2601	hypothetical protein/probable transcriptional regulator	SM
SM4	SM	N	4	3233432	C→A	0.067	missense_variant	A275S (GCC→TCC)	PA2881 ←	probable two‑component response regulator	SM
SM4	SM	N	4	3340778	Δ1 bp	0.065	intergenic	intergenic (‑29/+44)	PA2983 ← / ← PA2984	probable tolQ‑type transport protein/hypothetical protein	SM
SM4	SM	N	4	3340779	Δ1 bp	0.065	intergenic	intergenic (‑30/+43)	PA2983 ← / ← PA2984	probable tolQ‑type transport protein/hypothetical protein	SM
SM4	SM	N	4	3340780	Δ1 bp	0.064	intergenic	intergenic (‑31/+42)	PA2983 ← / ← PA2984	probable tolQ‑type transport protein/hypothetical protein	SM
SM4	SM	N	4	3340781	Δ1 bp	0.064	intergenic	intergenic (‑32/+41)	PA2983 ← / ← PA2984	probable tolQ‑type transport protein/hypothetical protein	SM
SM4	SM	N	4	3694556	C→T	0.056	missense_variant	G150D (GGC→GAC)	PA3297 ←	probable ATP‑dependent helicase	SM
SM4	SM	N	4	4743231	G→A	0.052	missense_variant	D270N (GAT→AAT)	pchD →	pyochelin biosynthesis protein PchD	SM
SM4	SM	N	4	1086115	Δ1 bp	0.078	frameshift_deletion	coding (574/603 nt)|coding (981/999 nt)	phnB →/mvfR ←	anthranilate synthase component II/Transcriptional regulator MvfR	SM
SM4	SM	N	4	1086116	Δ1 bp	0.078	frameshift_deletion	coding (575/603 nt)|coding (980/999 nt)	phnB →/mvfR ←	anthranilate synthase component II/Transcriptional regulator MvfR	SM
SM4	SM	N	4	4827580	T→C	0.277	missense_variant	S264G (AGC→GGC)	tadZ ←	TadZ	SM
SM4M	SM	Y	4	5638858	A→C	0.085	intergenic	intergenic (+54/‑91)	aceE → / → aceF	pyruvate dehydrogenase/dihydrolipoamide acetyltransferase	SMM
SM4M	SM	Y	4	4895858	A→C	0.525	missense_variant	H467P (CAC→CCC)	bifA →	BifA	SMM
SM4M	SM	Y	4	490405	T→G	0.072	missense_variant	Q85P (CAG→CCG)	codA ←	cytosine deaminase	SMM
SM4M	SM	Y	4	3497769	+GCGCTTGCGGA	0.148	insertion	coding (437/2760 nt)	fimV ←	Motility protein FimV	SMM
SM4M	SM	Y	4	943639	T→A	0.077	missense_variant	E268V (GAA→GTA)	PA0863 ←	probable oxidoreductase	SMM
SM4M	SM	Y	4	4588637	G→C	0.104	intergenic	intergenic (+147/+106)	PA4104 → / ← PA4105	conserved hypothetical protein/hypothetical protein	SMM
SM4M	SM	Y	4	4614941	T→G	0.05	synonymous_variant	R306R (CGT→CGG)	PA4126 →	probable major facilitator superfamily (MFS) transporter	SMM
SM4M	SM	Y	4	3320029	A→G	0.629	missense_variant	M1T (ATG→ACG) †	pilZ ←	type 4 fimbrial biogenesis protein PilZ	SMM
SM4M	SM	Y	4	226476	G→C	0.066	missense_variant	A292P (GCC→CCC)	pntB →	pyridine nucleotide transhydrogenase, beta subunit	SMM
SM4M	SM	Y	4	4962241	T→G	0.085	intergenic	intergenic (‑54/+32)	sspA ← / ← PA4429	stringent starvation protein A/probable cytochrome c1 precursor	SMM
SM5	SM	N	5	1698570	T→G	0.114	missense_variant	T460P (ACC→CCC)	aer ←	aerotaxis receptor Aer	SM
SM5	SM	N	5	1699604	C→A	0.131	missense_variant	R115L (CGG→CTG)	aer ←	aerotaxis receptor Aer	SM
SM5	SM	N	5	495323	A→G	0.17	synonymous_variant	H311H (CAT→CAC)	dht ←	dihydropyrimidinase	SM
SM5	SM	N	5	1086961	G→C	0.154	missense_variant	D45E (GAC→GAG)	mvfR ←	Transcriptional regulator MvfR	SM
SM5	SM	N	5	1408407	Δ3 bp	0.058	deletion	coding (523‑525/981 nt)	PA1297 ←	probable metal transporter	SM
SM5	SM	N	5	3817810	G→C	0.085	synonymous_variant	V241V (GTC→GTG)	PA3409 ←	probable transmembrane sensor	SM
SM5	SM	N	5	3874569	G→A	0.06	intergenic	intergenic (+733/+85)	PA3463 → / ← PA3464	conserved hypothetical protein/hypothetical protein	SM
SM5	SM	N	5	4827572	C→G	0.168	missense_variant	Q266H (CAG→CAC)	tadZ ←	TadZ	SM
SM5M	SM	Y	5	5638868	G→C	0.121	intergenic	intergenic (+64/‑81)	aceE → / → aceF	pyruvate dehydrogenase/dihydrolipoamide acetyltransferase	SMM
SM5M	SM	Y	5	5069905	T→C	0.534	missense_variant	L48P (CTG→CCG)	pilB →	type 4 fimbrial biogenesis protein PilB	SMM
SM5M	SM	Y	5	5070925	A→C	0.127	missense_variant	D388A (GAC→GCC)	pilB →	type 4 fimbrial biogenesis protein PilB	SMM
SM5M	SM	Y	5	5071649	Δ44 bp	0.073	intergenic	intergenic (+186/‑1003)	pilB → / → pilD	type 4 fimbrial biogenesis protein PilB/type 4 prepilin peptidase PilD	SMM
SM5M	SM	Y	5	2449281	C→A	0.088	missense_variant	V89F (GTC→TTC)	vqsM ←	AraC‑type transcriptional regulator VqsM	SMM
SM6	SM	N	6	1699430	C→T	0.325	gain_stop	W173* (TGG→TAG)	aer ←	aerotaxis receptor Aer	SM
SM6	SM	N	6	1086302	G→A	0.233	missense_variant	T265I (ACC→ATC)	mvfR ←	Transcriptional regulator MvfR	SM
SM6	SM	N	6	411130	C→G	0.083	intergenic	intergenic (‑196/‑94)	PA0366 ← / → PA0367	probable aldehyde dehydrogenase/probable transcriptional regulator	SM
SM6	SM	N	6	1373303	C→G	0.152	synonymous_variant	P181P (CCG→CCC)	PA1264 ←	probable transcriptional regulator	SM
SM6	SM	N	6	4448869	G→C	0.099	intergenic	intergenic (+651/+24)	PA3969 → / ← amn	conserved hypothetical protein/AMP nucleosidase	SM
SM6	SM	N	6	4277475	G→A	0.091	synonymous_variant	F491F (TTC→TTT)	secD ←	secretion protein SecD	SM
SM6	SM	N	6	4827856	C→T	0.068	missense_variant	V172I (GTC→ATC)	tadZ ←	TadZ	SM
SM6	SM	N	6	4828176	G→A	0.277	missense_variant	A65V (GCG→GTG)	tadZ ←	TadZ	SM
SM6M	SM	Y	6	5915278	A→G	0.058	missense_variant	V275A (GTG→GCG)	algP ←	alginate regulatory protein AlgP	SMM
SM6M	SM	Y	6	3791419	G→T	0.122	gain_stop	E25* (GAG→TAG)	amrZ →	alginate and motility regulator Z	SMM
SM6M	SM	Y	6	1671916	A→C	0.098	missense_variant	E643A (GAG→GCG)	dnaX →	DNA polymerase subunits gamma and tau	SMM
SM6M	SM	Y	6	425375	A→C	0.081	intergenic	intergenic (+34/‑129)	micA → / → PA0383	DNA mismatch repair protein MicA/conserved hypothetical protein	SMM
SM6M	SM	Y	6	196821	C→T	0.204	intergenic	intergenic (‑73/+190)	PA0172 ← / ← PA0173	hypothetical protein/probable methylesterase	SMM
SM6M	SM	Y	6	2041516	T→C	0.051	synonymous_variant	D1692D (GAT→GAC)	PA1874 →	hypothetical protein	SMM
SM6M	SM	Y	6	3874369	A→C	0.055	intergenic	intergenic (+533/+285)	PA3463 → / ← PA3464	conserved hypothetical protein/hypothetical protein	SMM
SM6M	SM	Y	6	4438550	A→T	0.138	intergenic	intergenic (+21/‑69)	PA3958 → / → PA3959	hypothetical protein/hypothetical protein	SMM
SMSA1	SMSA	N	1	1373303	C→G	0.169	synonymous_variant	P181P (CCG→CCC)	PA1264 ←	probable transcriptional regulator	SMSA
SMSA1	SMSA	N	1	3220187	G→A	0.109	missense_variant	V194I (GTC→ATC)	PA2867 →	probable chemotaxis transducer	SMSA
SMSA1	SMSA	N	1	4438546	C→G	0.064	intergenic	intergenic (+17/‑73)	PA3958 → / → PA3959	hypothetical protein/hypothetical protein	SMSA
SMSA1	SMSA	N	1	4448869	G→C	0.072	intergenic	intergenic (+651/+24)	PA3969 → / ← amn	conserved hypothetical protein/AMP nucleosidase	SMSA
SMSA1M	SMSA	Y	1	4933463	T→G	0.066	missense_variant	E86A (GAG→GCG)	argJ ←	glutamate N‑acetyltransferase	SMSAM
SMSA1M	SMSA	Y	1	1671916	A→C	0.064	missense_variant	E643A (GAG→GCG)	dnaX →	DNA polymerase subunits gamma and tau	SMSAM
SMSA1M	SMSA	Y	1	411130	C→G	0.072	intergenic	intergenic (‑196/‑94)	PA0366 ← / → PA0367	probable aldehyde dehydrogenase/probable transcriptional regulator	SMSAM
SMSA1M	SMSA	Y	1	821679	T→A	0.058	missense_variant	I59F (ATC→TTC)	PA0753 ←	hypothetical protein	SMSAM
SMSA1M	SMSA	Y	1	1373303	C→G	0.128	synonymous_variant	P181P (CCG→CCC)	PA1264 ←	probable transcriptional regulator	SMSAM
SMSA1M	SMSA	Y	1	2526197	T→G	0.062	missense_variant	S361R (AGC→CGC)	PA2296 ←	hypothetical protein	SMSAM
SMSA1M	SMSA	Y	1	3917072	G→C	0.056	synonymous_variant	R47R (CGC→CGG)	PA3499 ←	hypothetical protein	SMSAM
SMSA1M	SMSA	Y	1	226476	G→C	0.051	missense_variant	A292P (GCC→CCC)	pntB →	pyridine nucleotide transhydrogenase, beta subunit	SMSAM
SMSA1M	SMSA	Y	1	2449287	C→T	0.457	missense_variant	A87T (GCC→ACC)	vqsM ←	AraC‑type transcriptional regulator VqsM	SMSAM
SMSA2	SMSA	N	2	1698570	T→G	0.225	missense_variant	T460P (ACC→CCC)	aer ←	aerotaxis receptor Aer	SMSA
SMSA2	SMSA	N	2	1561309	G→A	0.053	synonymous_variant	L204L (CTG→TTG)	PA1433 ←	conserved hypothetical protein	SMSA
SMSA2	SMSA	N	2	2039778	C→G	0.077	missense_variant	A1113G (GCC→GGC)	PA1874 →	hypothetical protein	SMSA
SMSA2	SMSA	N	2	2041516	T→C	0.061	synonymous_variant	D1692D (GAT→GAC)	PA1874 →	hypothetical protein	SMSA
SMSA2	SMSA	N	2	3220198	G→T	0.081	missense_variant	M197I (ATG→ATT)	PA2867 →	probable chemotaxis transducer	SMSA
SMSA2	SMSA	N	2	3299019	C→T	0.063	intergenic	intergenic (‑98/‑3)	PA2942 ← / → PA2942.1	probable magnesium chelatase/P15	SMSA
SMSA2	SMSA	N	2	3874562	C→A	0.079	intergenic	intergenic (+726/+92)	PA3463 → / ← PA3464	conserved hypothetical protein/hypothetical protein	SMSA
SMSA2	SMSA	N	2	4402245	C→T	0.059	missense_variant	V98M (GTG→ATG)	PA3926 ←	probable major facilitator superfamily (MFS) transporter	SMSA
SMSA2M	SMSA	Y	2	5638868	G→C	0.094	intergenic	intergenic (+64/‑81)	aceE → / → aceF	pyruvate dehydrogenase/dihydrolipoamide acetyltransferase	SMSAM
SMSA2M	SMSA	Y	2	1373303	C→G	0.096	synonymous_variant	P181P (CCG→CCC)	PA1264 ←	probable transcriptional regulator	SMSAM
SMSA2M	SMSA	Y	2	3874369	A→C	0.079	intergenic	intergenic (+533/+285)	PA3463 → / ← PA3464	conserved hypothetical protein/hypothetical protein	SMSAM
SMSA2M	SMSA	Y	2	5047279	A→T	0.074	missense_variant	*158C (TGA→TGT)	PA4508 →	probable transcriptional regulator	SMSAM
SMSA2M	SMSA	Y	2	424548	A→T	0.073	intergenic	intergenic (+32/‑122)	thiG → / → micA	thiamine biosynthesis protein, thiazole moiety/DNA mismatch repair protein MicA	SMSAM
SMSA3	SMSA	N	3	1698917	A→T	0.357	missense_variant	L344Q (CTG→CAG)	aer ←	aerotaxis receptor Aer	SMSA
SMSA3	SMSA	N	3	2776694	A→G	0.057	missense_variant	L704P (CTG→CCG)	PA2462 ←	hypothetical protein	SMSA
SMSA3M	SMSA	Y	3	5638858	A→C	0.081	intergenic	intergenic (+54/‑91)	aceE → / → aceF	pyruvate dehydrogenase/dihydrolipoamide acetyltransferase	SMSAM
SMSA3M	SMSA	Y	3	5638868	G→C	0.082	intergenic	intergenic (+64/‑81)	aceE → / → aceF	pyruvate dehydrogenase/dihydrolipoamide acetyltransferase	SMSAM
SMSA3M	SMSA	Y	3	5915388	T→A	0.05	synonymous_variant	A238A (GCA→GCT)	algP ←	alginate regulatory protein AlgP	SMSAM
SMSA3M	SMSA	Y	3	4933463	T→G	0.062	missense_variant	E86A (GAG→GCG)	argJ ←	glutamate N‑acetyltransferase	SMSAM
SMSA3M	SMSA	Y	3	5694509	T→G	0.099	intergenic	intergenic (+28/‑67)	hslU → / → PA5055	heat shock protein HslU/hypothetical protein	SMSAM
SMSA3M	SMSA	Y	3	821679	T→A	0.06	missense_variant	I59F (ATC→TTC)	PA0753 ←	hypothetical protein	SMSAM
SMSA3M	SMSA	Y	3	1153414	G→C	0.072	missense_variant	S264T (AGC→ACC)	PA1067 →	probable transcriptional regulator	SMSAM
SMSA3M	SMSA	Y	3	1373303	C→G	0.138	synonymous_variant	P181P (CCG→CCC)	PA1264 ←	probable transcriptional regulator	SMSAM
SMSA3M	SMSA	Y	3	2059301	T→A	0.055	synonymous_variant	A13A (GCA→GCT)	PA1888 ←	hypothetical protein	SMSAM
SMSA3M	SMSA	Y	3	3874254	A→C	0.055	intergenic	intergenic (+418/+400)	PA3463 → / ← PA3464	conserved hypothetical protein/hypothetical protein	SMSAM
SMSA3M	SMSA	Y	3	3932723	T→A	0.072	gain_stop	K199* (AAG→TAG)	PA3516 ←	probable lyase	SMSAM
SMSA3M	SMSA	Y	3	4408891	T→A	0.077	intergenic	intergenic (+157/‑33)	PA3932 → / → PA3933	probable transcriptional regulator/probable choline transporter	SMSAM
SMSA3M	SMSA	Y	3	4438550	A→T	0.11	intergenic	intergenic (+21/‑69)	PA3958 → / → PA3959	hypothetical protein/hypothetical protein	SMSAM
SMSA3M	SMSA	Y	3	4448866	T→A	0.064	intergenic	intergenic (+648/+27)	PA3969 → / ← amn	conserved hypothetical protein/AMP nucleosidase	SMSAM
SMSA3M	SMSA	Y	3	4448869	G→C	0.061	intergenic	intergenic (+651/+24)	PA3969 → / ← amn	conserved hypothetical protein/AMP nucleosidase	SMSAM
SMSA3M	SMSA	Y	3	4588600	A→T	0.081	intergenic	intergenic (+110/+143)	PA4104 → / ← PA4105	conserved hypothetical protein/hypothetical protein	SMSAM
SMSA3M	SMSA	Y	3	4588637	G→C	0.082	intergenic	intergenic (+147/+106)	PA4104 → / ← PA4105	conserved hypothetical protein/hypothetical protein	SMSAM
SMSA3M	SMSA	Y	3	226476	G→C	0.052	missense_variant	A292P (GCC→CCC)	pntB →	pyridine nucleotide transhydrogenase, beta subunit	SMSAM
SMSA3M	SMSA	Y	3	5113920	A→C	0.166	missense_variant	L227R (CTG→CGG)	proB ←	glutamate 5‑kinase	SMSAM
SMSA3M	SMSA	Y	3	1844903	+GTTGGC	0.69	insertion	coding (351/1110 nt)	pscP ←	translocation protein in type III secretion	SMSAM
SMSA3M	SMSA	Y	3	4962241	T→G	0.081	intergenic	intergenic (‑54/+32)	sspA ← / ← PA4429	stringent starvation protein A/probable cytochrome c1 precursor	SMSAM
SMSA3M	SMSA	Y	3	4962242	A→T	0.082	intergenic	intergenic (‑55/+31)	sspA ← / ← PA4429	stringent starvation protein A/probable cytochrome c1 precursor	SMSAM
SMSA3M	SMSA	Y	3	2449281	C→A	0.45	missense_variant	V89F (GTC→TTC)	vqsM ←	AraC‑type transcriptional regulator VqsM	SMSAM
SMSA3M	SMSA	Y	3	2449287	C→T	0.129	missense_variant	A87T (GCC→ACC)	vqsM ←	AraC‑type transcriptional regulator VqsM	SMSAM
SMSA4	SMSA	N	4	5638868	G→C	0.103	intergenic	intergenic (+64/‑81)	aceE → / → aceF	pyruvate dehydrogenase/dihydrolipoamide acetyltransferase	SMSA
SMSA4	SMSA	N	4	1671916	A→C	0.073	missense_variant	E643A (GAG→GCG)	dnaX →	DNA polymerase subunits gamma and tau	SMSA
SMSA4	SMSA	N	4	411130	C→G	0.071	intergenic	intergenic (‑196/‑94)	PA0366 ← / → PA0367	probable aldehyde dehydrogenase/probable transcriptional regulator	SMSA
SMSA4	SMSA	N	4	943639	T→A	0.093	missense_variant	E268V (GAA→GTA)	PA0863 ←	probable oxidoreductase	SMSA
SMSA4	SMSA	N	4	2526209	T→G	0.056	missense_variant	S357R (AGC→CGC)	PA2296 ←	hypothetical protein	SMSA
SMSA4	SMSA	N	4	3589310	T→G	0.054	intergenic	intergenic (‑39/+42)	PA3196 ← / ← PA3197	hypothetical protein/hypothetical protein	SMSA
SMSA4	SMSA	N	4	3932723	T→A	0.083	gain_stop	K199* (AAG→TAG)	PA3516 ←	probable lyase	SMSA
SMSA4	SMSA	N	4	4035594	T→A	0.055	intergenic	intergenic (+16/+12)	PA3599 → / ← PA3600	probable transcriptional regulator/conserved hypothetical protein	SMSA
SMSA4	SMSA	N	4	4448869	G→C	0.104	intergenic	intergenic (+651/+24)	PA3969 → / ← amn	conserved hypothetical protein/AMP nucleosidase	SMSA
SMSA4M	SMSA	Y	4	411130	C→G	0.073	intergenic	intergenic (‑196/‑94)	PA0366 ← / → PA0367	probable aldehyde dehydrogenase/probable transcriptional regulator	SMSAM
SMSA4M	SMSA	Y	4	943639	T→A	0.064	missense_variant	E268V (GAA→GTA)	PA0863 ←	probable oxidoreductase	SMSAM
SMSA4M	SMSA	Y	4	1408407	Δ3 bp	0.061	deletion	coding (523‑525/981 nt)	PA1297 ←	probable metal transporter	SMSAM
SMSA4M	SMSA	Y	4	2039331	G→C	0.058	missense_variant	G964A (GGC→GCC)	PA1874 →	hypothetical protein	SMSAM
SMSA4M	SMSA	Y	4	2449784	C→A	0.879	missense_variant	D328Y (GAT→TAT)	PA2228 ←	hypothetical protein	SMSAM
SMSA4M	SMSA	Y	4	4448871	A→C	0.052	intergenic	intergenic (+653/+22)	PA3969 → / ← amn	conserved hypothetical protein/AMP nucleosidase	SMSAM
SMSA4M	SMSA	Y	4	5269686	C→T	0.067	intergenic	intergenic (‑427/+117)	PA4690.5 ← / ← PA4691	16S ribosomal RNA/hypothetical protein	SMSAM
SMSA4M	SMSA	Y	4	5431327	T→A	0.057	intergenic	intergenic (+189/+54)	PA4838 → / ← speA	hypothetical protein/biosynthetic arginine decarboxylase	SMSAM
SMSA4M	SMSA	Y	4	424548	A→T	0.065	intergenic	intergenic (+32/‑122)	thiG → / → micA	thiamine biosynthesis protein, thiazole moiety/DNA mismatch repair protein MicA	SMSAM
SMSA5	SMSA	N	5	1698548	Δ3 bp	0.284	deletion	coding (1398‑1400/1566 nt)	aer ←	aerotaxis receptor Aer	SMSA
SMSA5	SMSA	N	5	5915270	A→T	0.055	missense_variant	S278T (TCC→ACC)	algP ←	alginate regulatory protein AlgP	SMSA
SMSA5	SMSA	N	5	495323	A→G	0.208	synonymous_variant	H311H (CAT→CAC)	dht ←	dihydropyrimidinase	SMSA
SMSA5	SMSA	N	5	1188129	A→C	0.068	missense_variant	E181D (GAA→GAC)	fleQ →	transcriptional regulator FleQ	SMSA
SMSA5	SMSA	N	5	2037583	T→C	0.055	synonymous_variant	G381G (GGT→GGC)	PA1874 →	hypothetical protein	SMSA
SMSA5	SMSA	N	5	2038335	C→G	0.057	missense_variant	T632S (ACC→AGC)	PA1874 →	hypothetical protein	SMSA
SMSA5	SMSA	N	5	2038549	G→C	0.058	synonymous_variant	G703G (GGG→GGC)	PA1874 →	hypothetical protein	SMSA
SMSA5	SMSA	N	5	2038756	C→T	0.06	synonymous_variant	S772S (AGC→AGT)	PA1874 →	hypothetical protein	SMSA
SMSA5	SMSA	N	5	2038758	G→C	0.082	missense_variant	S773T (AGC→ACC)	PA1874 →	hypothetical protein	SMSA
SMSA5	SMSA	N	5	2038765	T→A	0.1	synonymous_variant	T775T (ACT→ACA)	PA1874 →	hypothetical protein	SMSA
SMSA5	SMSA	N	5	2038774	T→C	0.07	synonymous_variant	D778D (GAT→GAC)	PA1874 →	hypothetical protein	SMSA
SMSA5	SMSA	N	5	2039248	T→C	0.086	synonymous_variant	A936A (GCT→GCC)	PA1874 →	hypothetical protein	SMSA
SMSA5	SMSA	N	5	2039330	G→T	0.072	missense_variant	G964C (GGC→TGC) ‡	PA1874 →	hypothetical protein	SMSA
SMSA5	SMSA	N	5	2039331	G→C	0.077	missense_variant	G964A (GGC→GCC) ‡	PA1874 →	hypothetical protein	SMSA
SMSA5	SMSA	N	5	2039350	C→A	0.066	synonymous_variant	G970G (GGC→GGA)	PA1874 →	hypothetical protein	SMSA
SMSA5	SMSA	N	5	2039533	G→C	0.073	synonymous_variant	G1031G (GGG→GGC)	PA1874 →	hypothetical protein	SMSA
SMSA5	SMSA	N	5	2039576	T→G	0.051	missense_variant	S1046A (TCC→GCC)	PA1874 →	hypothetical protein	SMSA
SMSA5	SMSA	N	5	2039749	T→C	0.062	synonymous_variant	I1103I (ATT→ATC)	PA1874 →	hypothetical protein	SMSA
SMSA5	SMSA	N	5	2039778	C→G	0.055	missense_variant	A1113G (GCC→GGC)	PA1874 →	hypothetical protein	SMSA
SMSA5	SMSA	N	5	2040006	C→G	0.089	missense_variant	A1189G (GCC→GGC)	PA1874 →	hypothetical protein	SMSA
SMSA5	SMSA	N	5	2041260	T→C	0.059	missense_variant	V1607A (GTC→GCC)	PA1874 →	hypothetical protein	SMSA
SMSA5	SMSA	N	5	2041319	T→A	0.093	missense_variant	S1627T (TCG→ACG)	PA1874 →	hypothetical protein	SMSA
SMSA5	SMSA	N	5	2041325	A→G	0.073	missense_variant	I1629V (ATC→GTC)	PA1874 →	hypothetical protein	SMSA
SMSA5	SMSA	N	5	2041516	T→C	0.065	synonymous_variant	D1692D (GAT→GAC)	PA1874 →	hypothetical protein	SMSA
SMSA5	SMSA	N	5	2199745	C→G	0.094	intergenic	intergenic (+51/+17)	PA2010 → / ← liuE	probable transcriptional regulator/3‑hydroxy‑3‑methylglutaryl‑CoA lyase	SMSA
SMSA5	SMSA	N	5	2558329	C→A	0.06	intergenic	intergenic (+365/+589)	PA2319 → / ← gntR	probable transposase/transcriptional regulator GntR	SMSA
SMSA5	SMSA	N	5	3873977	A→G	0.059	intergenic	intergenic (+141/+677)	PA3463 → / ← PA3464	conserved hypothetical protein/hypothetical protein	SMSA
SMSA5	SMSA	N	5	3874135	T→C	0.085	intergenic	intergenic (+299/+519)	PA3463 → / ← PA3464	conserved hypothetical protein/hypothetical protein	SMSA
SMSA5	SMSA	N	5	3874562	C→T	0.085	intergenic	intergenic (+726/+92)	PA3463 → / ← PA3464	conserved hypothetical protein/hypothetical protein	SMSA
SMSA5	SMSA	N	5	3874583	C→A	0.099	intergenic	intergenic (+747/+71)	PA3463 → / ← PA3464	conserved hypothetical protein/hypothetical protein	SMSA
SMSA5	SMSA	N	5	3874591	A→T	0.076	intergenic	intergenic (+755/+63)	PA3463 → / ← PA3464	conserved hypothetical protein/hypothetical protein	SMSA
SMSA5	SMSA	N	5	5188211	C→A	0.086	synonymous_variant	A1555A (GCG→GCT)	PA4625 ←	hypothetical protein	SMSA
SMSA5	SMSA	N	5	5189399	G→A	0.061	synonymous_variant	D1159D (GAC→GAT)	PA4625 ←	hypothetical protein	SMSA
SMSA5	SMSA	N	5	5189420	C→T	0.102	synonymous_variant	A1152A (GCG→GCA)	PA4625 ←	hypothetical protein	SMSA
SMSA5	SMSA	N	5	5189657	G→C	0.052	synonymous_variant	L1073L (CTC→CTG)	PA4625 ←	hypothetical protein	SMSA
SMSA5M	SMSA	Y	5	5638868	G→C	0.08	intergenic	intergenic (+64/‑81)	aceE → / → aceF	pyruvate dehydrogenase/dihydrolipoamide acetyltransferase	SMSAM
SMSA5M	SMSA	Y	5	4933463	T→G	0.056	missense_variant	E86A (GAG→GCG)	argJ ←	glutamate N‑acetyltransferase	SMSAM
SMSA5M	SMSA	Y	5	495323	A→G	0.08	synonymous_variant	H311H (CAT→CAC)	dht ←	dihydropyrimidinase	SMSAM
SMSA5M	SMSA	Y	5	411130	C→G	0.059	intergenic	intergenic (‑196/‑94)	PA0366 ← / → PA0367	probable aldehyde dehydrogenase/probable transcriptional regulator	SMSAM
SMSA5M	SMSA	Y	5	2689790	A→C	0.094	missense_variant	Q75P (CAG→CCG)	PA2406 →	hypothetical protein	SMSAM
SMSA5M	SMSA	Y	5	2791679	T→G	0.085	missense_variant	F154V (TTC→GTC)	PA2473 →	probable glutathione S‑transferase	SMSAM
SMSA5M	SMSA	Y	5	3874464	G→T	0.053	intergenic	intergenic (+628/+190)	PA3463 → / ← PA3464	conserved hypothetical protein/hypothetical protein	SMSAM
SMSA5M	SMSA	Y	5	4438539	C→G	0.166	intergenic	intergenic (+10/‑80)	PA3958 → / → PA3959	hypothetical protein/hypothetical protein	SMSAM
SMSA5M	SMSA	Y	5	4438546	C→G	0.077	intergenic	intergenic (+17/‑73)	PA3958 → / → PA3959	hypothetical protein/hypothetical protein	SMSAM
SMSA5M	SMSA	Y	5	4588637	G→C	0.082	intergenic	intergenic (+147/+106)	PA4104 → / ← PA4105	conserved hypothetical protein/hypothetical protein	SMSAM
SMSA5M	SMSA	Y	5	4737225	T→G	0.054	missense_variant	Q1296P (CAG→CCG)	pchE ←	dihydroaeruginoic acid synthetase	SMSAM
SMSA5M	SMSA	Y	5	226476	G→C	0.071	missense_variant	A292P (GCC→CCC)	pntB →	pyridine nucleotide transhydrogenase, beta subunit	SMSAM
SMSA5M	SMSA	Y	5	2449281	C→A	0.771	missense_variant	V89F (GTC→TTC)	vqsM ←	AraC‑type transcriptional regulator VqsM	SMSAM
SMSA6	SMSA	N	6	1671916	A→C	0.079	missense_variant	E643A (GAG→GCG)	dnaX →	DNA polymerase subunits gamma and tau	SMSA
SMSA6	SMSA	N	6	1086302	G→A	0.059	missense_variant	T265I (ACC→ATC)	mvfR ←	Transcriptional regulator MvfR	SMSA
SMSA6	SMSA	N	6	3874254	A→C	0.058	intergenic	intergenic (+418/+400)	PA3463 → / ← PA3464	conserved hypothetical protein/hypothetical protein	SMSA
SMSA6M	SMSA	Y	6	1671916	A→C	0.052	missense_variant	E643A (GAG→GCG)	dnaX →	DNA polymerase subunits gamma and tau	SMSAM
SMSA6M	SMSA	Y	6	1408407	Δ3 bp	0.054	deletion	coding (523‑525/981 nt)	PA1297 ←	probable metal transporter	SMSAM
SMSA6M	SMSA	Y	6	2310471	C→G	0.103	missense_variant	R39G (CGC→GGC)	PA2099 →	probable short‑chain dehydrogenase	SMSAM
SMSA6M	SMSA	Y	6	3589310	T→G	0.061	intergenic	intergenic (‑39/+42)	PA3196 ← / ← PA3197	hypothetical protein/hypothetical protein	SMSAM
SMSA6M	SMSA	Y	6	3874468	C→A	0.052	intergenic	intergenic (+632/+186)	PA3463 → / ← PA3464	conserved hypothetical protein/hypothetical protein	SMSAM
SMSA6M	SMSA	Y	6	4588637	G→C	0.06	intergenic	intergenic (+147/+106)	PA4104 → / ← PA4105	conserved hypothetical protein/hypothetical protein	SMSAM
SMSA6M	SMSA	Y	6	4754568	A→T	0.071	missense_variant	V286E (GTG→GAG)	rpoA ←	DNA‑directed RNA polymerase alpha chain	SMSAM
SMSA6M	SMSA	Y	6	424548	A→T	0.052	intergenic	intergenic (+32/‑122)	thiG → / → micA	thiamine biosynthesis protein, thiazole moiety/DNA mismatch repair protein MicA	SMSAM
SMSA6M	SMSA	Y	6	6188139	T→A	0.086	intergenic	intergenic (+262/+27)	thrB → / ← nrdJb	homoserine kinase/NrdJb	SMSAM
SMSA6M	SMSA	Y	6	2449287	C→T	0.804	missense_variant	A87T (GCC→ACC)	vqsM ←	AraC‑type transcriptional regulator VqsM	SMSAM
