# Supplementary material for: Co-occurring microflora and mucin drive Pseudomonas aeruginosa diversification and pathoadaptation
Source: ISME Commun. 2024 Mar 28;4(1):ycae043. doi: 10.1093/ismeco/ycae043 (PMC11067959; doi:10.1093/ismeco/ycae043)
Supplement: Table_S5_ycae043 [file table_s5_ycae043.xlsx]

## Sheet: clones
Table S4. Mutations identified in inidividually sequenced evolved P. aeruginosa clones
sample id	competitor	mucin	population	clone ID	gene	annotation	type	freq in pop seq
PA1M	NONE	Y	1	12	pslD →	Δ33 bp	deletion	0.237
PA1M	NONE	Y	1	11	PA4075 ← / → PA4076	intergenic (‑48/‑59)	intergenic	na
PA2M	NONE	Y	2	8	[vqsM]–[PA2228]	Δ293 bp	deletion	na
PA3M	NONE	Y	3	8	[PA2228]	Δ1,049 bp	deletion	na
PA3M	NONE	Y	3	12	rpoA ←	V286M (GTG→ATG)	missense	na
PA4M	NONE	Y	4	9	mvfR ←	H176P (CAC→CCC)	missense	0.798
PA5M	NONE	Y	5	7	PA1244 ← / → PA1245	intergenic (‑244/‑771)	intergenic	0.403
PA5M	NONE	Y	5	7	PA3463 → / ← PA3464	intergenic (‑244/‑771)	intergenic	0.066
PA6M	NONE	Y	6	5	PA2228 ←	Δ273 bp	deletion	na
PA6M	NONE	Y	6	2	mvfR ←	T265I (ACC→ATC)	missense	0.81
PA6M	NONE	Y	6	2	PA5266 ←	V672V (GTC→GTT)	missense	na
SA1M	SA	Y	1	8	PA2229–[pslO]	17 genes	deletion	na
SA1M	SA	Y	1	8	parR ←	Q35Q (CAG→CAA)	missense	na
SA4M	SA	Y	4	3	[vqsM]–[PA2229]	Δ2,998 bp	deletion	na
SA4M	SA	Y	4	12	[vqsM]–[PA2229]	Δ2,998 bp	deletion	na
SA5M	SA	Y	5	6	PA1328 ←	A245V (GCA→GTA)	missense	na
SA6M	SA	Y	6	12	dnaX →	Δ15 bp	deletion	0.227
SM2M	SM	Y	2	6	bifA →	Q434* (CAG→TAG)	stop	0.071
SM4M	SM	Y	4	4	pilB →	T278P (ACC→CCC)	missense	0.534
SM4M	SM	Y	4	4	[PA2229]	Δ458 bp	deletion	na
SM5M	SM	Y	5	1	vqsM ←	V89F (GTC→TTC)	missense	0.088
SM5M	SM	Y	5	1	pilB →	D388A (GAC→GCC)	missense	0.127
SM6M	SM	Y	6	9	PA2229–PA2230	Δ2,048 bp	deletion	na
SMSA2M	SMSA	Y	2	1	PA2228 ← / → PA2229	Δ382 bp	deletion	na
SMSA3M	SMSA	Y	3	4	vqsM ←	A87T (GCC→ACC)	missense	0.129
SMSA4M	SMSA	Y	4	6	PA2228 ←	D328Y (GAT→TAT)	missense	0.879
SMSA4M	SMSA	Y	4	9	PA2228 ←	D328Y (GAT→TAT)	missense	0.879
SMSA5M	SMSA	Y	5	9	vqsM ←	V89F (GTC→TTC)	missense	0.771
SMSA6M	SMSA	Y	6	7	vqsM ←	A87T (GCC→ACC)	missense	0.804
SMSA6M	SMSA	Y	6	12	pheS ←	T226A (ACC→GCC)	missense	na
SMSA6M	SMSA	Y	6	12	vqsM ←	A87T (GCC→ACC)	missense	0.804
PA1	NONE	N	1	2	[vqsM]–[PA2229]	Δ2,515 bp	deletion	na
PA1	NONE	N	1	2	nfxB →	L29L (CTG→CTA)	missense	0.66
PA2	NONE	N	2	9	rpoS ←	V278G (GTG→GGG)	missense	na
PA2	NONE	N	2	11	lasR →	G113R (GGG→AGG)	missense	0.088
PA3	NONE	N	3	6	PA2228 ←	Δ22 bp	deletion	0.867
PA4	NONE	N	4	12	mvfR ←	A38V (GCG→GTG)	missense	0.107
PA5	NONE	N	5	10	[vqsM]–PA2230	Δ4,593 bp	deletion	na
PA6	NONE	N	6	7	mvfR ←	T265I (ACC→ATC)	missense	0.81
PA6	NONE	N	6	7	pilY1 →	Δ16 bp	deletion	0.299
SA3	SA	N	3	5	mvfR ←	L42R (CTG→CGG)	missense	0.111
SM1	SM	N	1	11	aer ←	T461P (ACC→CCC)	missense	0
SM2	SM	N	2	9	tadZ ←	S264N (AGC→AAC)	missense	0.526
SM3	SM	N	3	6	tadZ ←	L267F (TTG→TTT)	missense	0.317
SM4	SM	N	4	10	aer ←	Δ77 bp	deletion	0.211
SM5	SM	N	5	3	aer ←	R115L (CGG→CTG)	missense	0.131
SM6	SM	N	6	4	tadZ ←	A65V (GCG→GTG)	missense	0.277
SMSA2	SMSA	N	2	8	PA2867 →	M197I (ATG→ATA)	missense	0.081
SMSA3	SMSA	N	3	2	PA2867 →	(CCG)4→3	duplication	0
SMSA5	SMSA	N	5	7	aer ←	(GCG)4→3	duplication	0.284
